# Supplementary figures and images for: Cell Cycle–Specified Fluctuation of Nucleosome Occupancy at Gene Promoters
Source: PLOS journal article supplement (doi:10.1371/journal.pgen.0020158), 2006-09-19

Figure S1 - Hogan, Lee, and Lieb

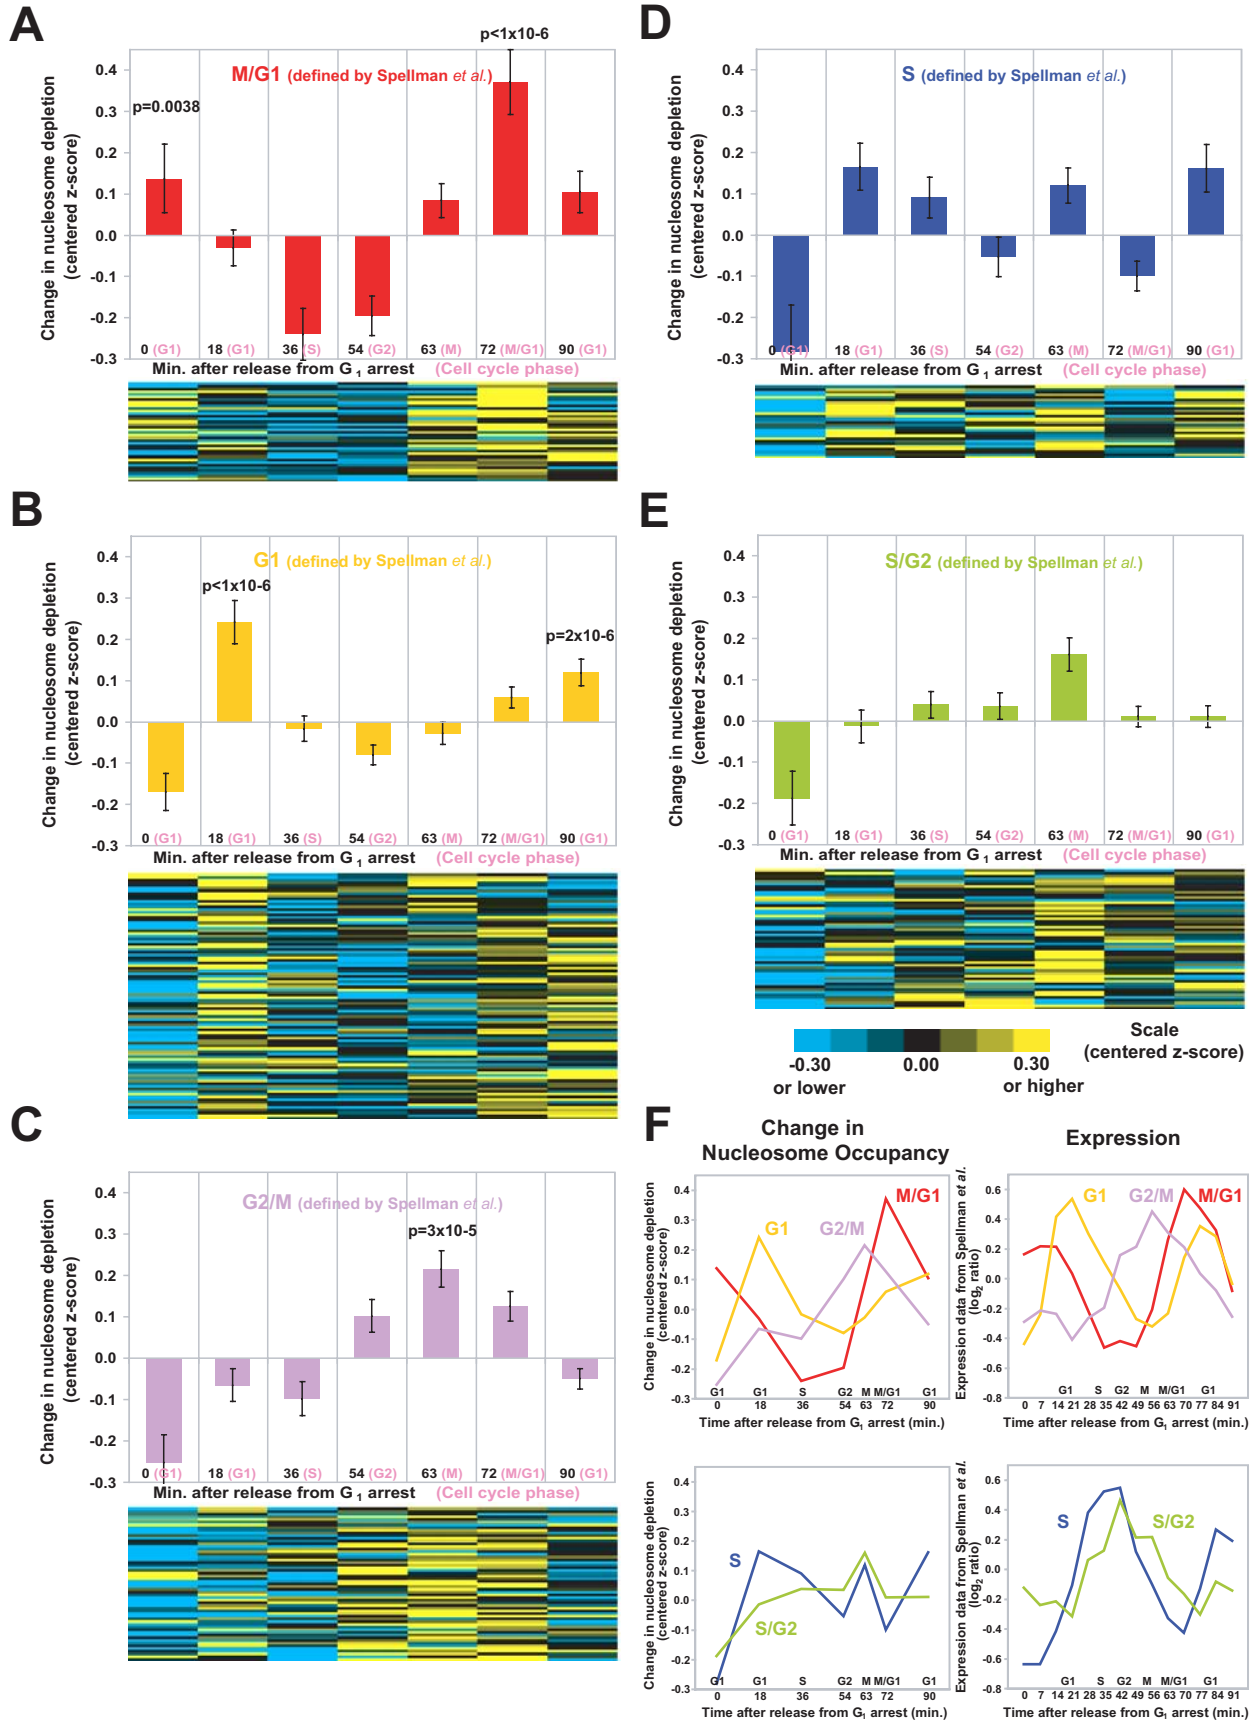

Supplement: S1 (10.1371/journal.pgen.0020158.s001) [file journal.pgen.0020158.s001]
